# Supplementary material for: Elevated Admission Base Deficit Is Associated with a Complex Dynamic Network of Systemic Inflammation Which Drives Clinical Trajectories in Blunt Trauma Patients
Source: Hindawi journal article supplement (doi:10.1155/2016/7950374), 2016-01-01
Supplement: f1 [file 7950374.f1.pdf]

## Supplementary Material

**Fig. S1 Innate Inflammatory Mediators**

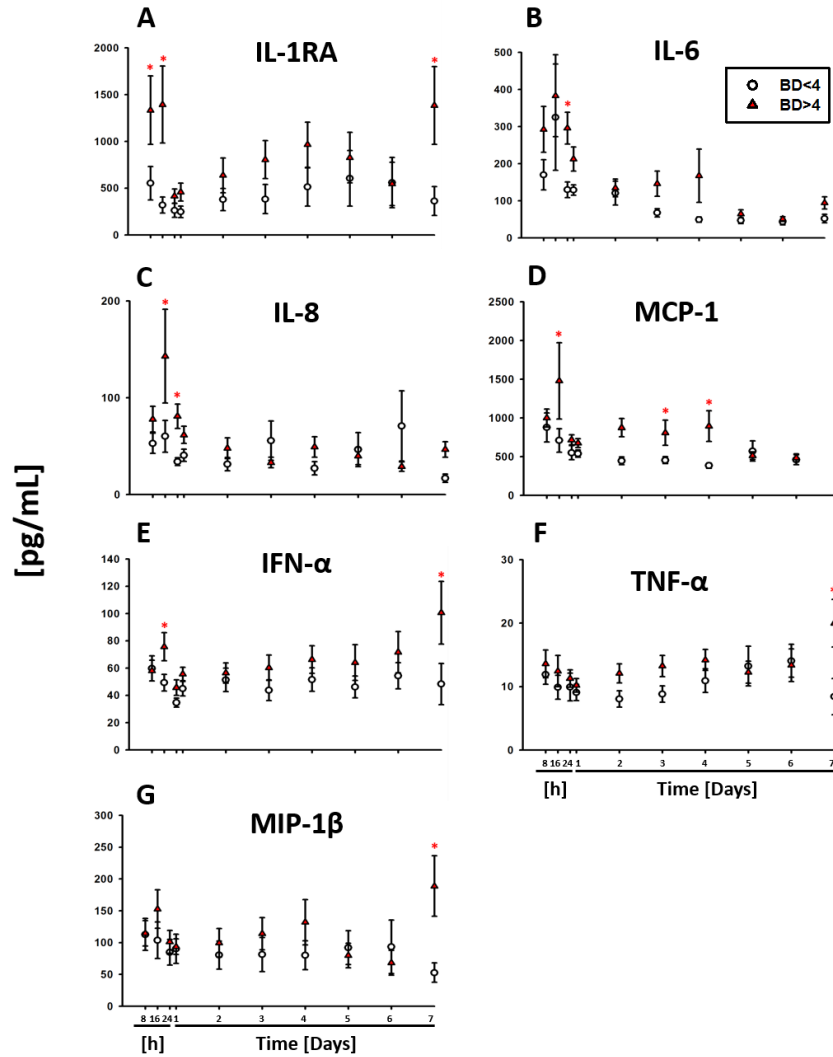

**Figure S1. Time course analysis of innate-derived biomarkers between the BD  $\geq 4$  and BD  $< 4$  sub-groups from time of injury up to day 7.** Mean circulating levels of inflammatory mediators in BD  $\geq 4$  (n = 84) vs. BD  $< 4$  (n = 70). **(A)** Time course of IL-1RA. **(B)** Time course of IL-6. **(C)** Time course of IL-8. **(D)** Time course of MCP-1. **(E)** Time course IFN- $\alpha$ . **(F)** Time course of TNF- $\alpha$ . **(G)** Time course of MIP-1 $\beta$ . The indicated inflammatory mediators were assessed in serial plasma samples obtained at the indicated time points. Values are mean  $\pm$  SEM. \* $P < 0.05$  by Two-Way ANOVA.

**Fig. S2 Lymphoid Inflammatory Mediators**

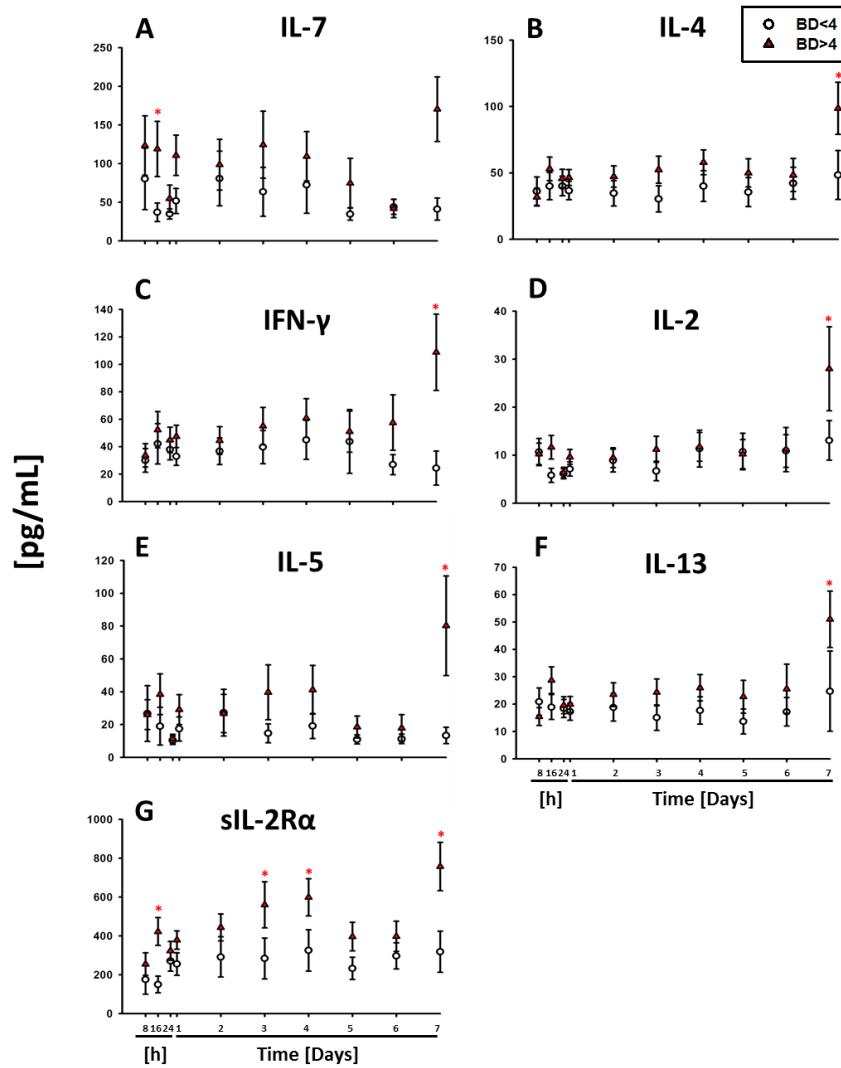

**Figure S2. Time course analysis of lymphoid-derived biomarkers between the BD  $\geq$  4 and BD < 4 sub-groups from time of injury up to day 7.** Mean circulating levels of inflammatory mediators in BD  $\geq$  4 (n = 84) vs. BD < 4 (n = 70). (A) Time course of IL-7. (B) Time course of IL-4. (C) Time course of IFN- $\gamma$ . (D) Time course of IL-2. (E) Time course IL-5. (F) Time course of IL-13. (G) Time course of sIL-2R $\alpha$ . The indicated inflammatory mediators were assessed in serial plasma samples obtained at the indicated time points. Values are mean  $\pm$  SEM. \* $P < 0.05$  by Two-Way ANOVA.
